|           | Description                                                     | Experiments used                                             | Dilution for infection | Map                                                                             |
|-----------|-----------------------------------------------------------------|--------------------------------------------------------------|------------------------|---------------------------------------------------------------------------------|
| vXC1      | Sindbis virus expressing mCherry and a N20 barcode in the 3'UTR | Rolony quantifications                                       | 1:10                   | <a href="https://benchling.com/s/iwgYgAZi">https://benchling.com/s/iwgYgAZi</a> |
| IDP468-F2 | Sindbis virus expressing mCherry                                | Calibration of sequencing channels                           | 1:100                  | <a href="https://benchling.com/s/JX8PQY0R">https://benchling.com/s/JX8PQY0R</a> |
| JK100L2   | Sindbis virus expressing GFP and a N30 barcode in the 3'UTR     | 15-base sequencing and comparison between SOLiD and Illumina | 1:100                  | <a href="https://benchling.com/s/EKtQttOe">https://benchling.com/s/EKtQttOe</a> |

Supp Table S1. List of viruses used.

|      |                                                                                     |                                         |
|------|-------------------------------------------------------------------------------------|-----------------------------------------|
| XC11 | /5phos/aatcagccataccacattgtagaggTTCCTCTATGATTACTGACTGCGTCTATTTAGTGGAGCCATTGC        |                                         |
| 49   | TATCTTCTTgggccgcgactctagatcat                                                       | IDP468-F2 padlock, nogap                |
| XC11 | /5phos/ccacattgtagaggTgcataatgttgTCCTCTATGATTACTGACTGCGTCTATTTAGTGGAGCCATTGC        |                                         |
| 51   | TATCTTCTTgggccgcgactctagatcat                                                       | IDP468-F2 padlock, 11nt gap             |
| XC11 | /5phos/gtcataatgttgcgagtgTTCCTCTATGATTACTGACTGCGTCTATTTAGTGGAGCCATTGCTAT            |                                         |
| 57   | CTTCTTaatcagccataccacattgtagag                                                      | pXC1 padlock                            |
| XC11 | /5phos/gtactgcggccgctacctaTCCTCTATGATTACTGACTGCGTCTATTTAGTGGAGCCATTGCTATCT          |                                         |
| 64   | TCTTAcacgacgctctccgatct                                                             | padlock for JK100L2 barcode             |
| XC12 |                                                                                     |                                         |
| 15   | /5AmMC12/T+AC+AG+CT+AG+CG+GT+GGTCGTACCTCACGACG                                      | JK100L2 LNA RT primer                   |
| XC12 |                                                                                     | IDP468-F2 and pXC1 LNA RT primer        |
| 16   | /5AmMC12/G+GT+TA+AT+AT+AG+TG+GTTATGTGGCAACACTGC                                     | with single crosslinker                 |
|      |                                                                                     | Padlock probes for subsampling          |
| XC16 | /5phos/gtcataatgttgcgagtgTcctctatgactgactgctctTTTAGTGGAGCCATTGCTATCTTCTTaatcagcc    | rolonies from vXC1, use XC92 to         |
| 15   | ataccacattgtagag                                                                    | visualize                               |
|      |                                                                                     | Padlock probes for subsampling          |
| XC16 | /5phos/gtcataatgttgcgagtgTgactgtcctctggacaataccgtccTTTAGTGGAGCCATTGCTATCTTCTTaatcag | rolonies from vXC1, use XC1380 to       |
| 16   | ccataccacattgtagag                                                                  | visualize                               |
|      |                                                                                     | fluorescent probe for visualizing all   |
|      |                                                                                     | rolonies except those made with         |
|      |                                                                                     | XC1616                                  |
| XC92 | /5TYE563/CCTCTATGATTACTGACTGCGTCTa                                                  |                                         |
| XC13 |                                                                                     |                                         |
| 80   | /5TYE563/atatagactgtcctctggacaataccgtcc                                             | fluorescent probe for XC1616 rolonies   |
| XC15 | /5phos/aatcagccataccacattgtagaggTTCCTCTATGATTACTGACTGCGTCTATTTAGTGGAGCCATTGC        |                                         |
| 95   | TATCTTCTTgggccgcgactctagatc*a*t                                                     | padlocks for in vitro tests, no gap     |
| XC15 | /5phos/ccacattgtagaggTgcataatgttgTCCTCTATGATTACTGACTGCGTCTATTTAGTGGAGCCATTGC        |                                         |
| 96   | TATCTTCTTgggccgcgactctagatc*a*t                                                     | padlocks for in vitro tests, 11nt gap   |
| XC15 |                                                                                     | mock cDNA for testing gap filling in    |
| 29   | cacctctacaatgtggtatggctgattatgatctagagtcgcgccc/3phos/                               | in vitro                                |
| XC13 | /5phos/aatcagccataccacattgtagaggTTCCTCTATGATTACTGACTGCGTCTATTTAGTGGAGCCATTGC        | barcode padlocks for calibration, to be |
| 08   | atcgTATCTTCTTgggccgcgactctagatcat                                                   | used on IDP468-F2                       |
| XC13 | /5phos/aatcagccataccacattgtagaggTTCCTCTATGATTACTGACTGCGTCTATTTAGTGGAGCCATTGC        | barcode padlocks for calibration, to be |
| 09   | tcgaTATCTTCTTgggccgcgactctagatcat                                                   | used on IDP468-F2                       |
| XC13 | /5phos/aatcagccataccacattgtagaggTTCCTCTATGATTACTGACTGCGTCTATTTAGTGGAGCCATTGC        | barcode padlocks for calibration, to be |
| 10   | cgatTATCTTCTTgggccgcgactctagatcat                                                   | used on IDP468-F2                       |
| XC13 | /5phos/aatcagccataccacattgtagaggTTCCTCTATGATTACTGACTGCGTCTATTTAGTGGAGCCATTGC        | barcode padlocks for calibration, to be |
| 11   | gatcTATCTTCTTgggccgcgactctagatcat                                                   | used on IDP468-F2                       |
| XC13 |                                                                                     | Illumina seq primer for barcode         |
| 12   | ACTGCGTCTATTTAGTGGAGCCATTGC                                                         | padlock calibration.                    |

XC10  
16 /5phos/TCTCGGGAACGCTGAAGAacactgcgcaacattatgca  
XC10  
17 cagccataccacattgtagagg  
XC14  
93 /5phos/gtactgcggccgctacctaaTCCTCT  
XC14  
94 /5phos/tactgcggccgctacctaaTCCTCT  
XC14  
95 /5phos/actgcggccgctacctaaTCCTCT  
XC14  
96 /5phos/ctgcggccgctacctaaTCCTCT  
XC14  
97 /5phos/tgcggccgctacctaaTCCTCT

Supp Table S2. List of oligonucleotides used.

3'UTR RT primer for IDP468-F2, for  
FISSEQ  
3'UTR RCA primer for IDP468-F2,  
for FISSEQ  
SOLiD sequencing primers for  
padlocks XC1164  
SOLiD sequencing primers for  
padlocks XC1164
